# Supplementary material for: Hydrated anion glued capsular and non-capsular assembly of a tripodal host: Solid state recognition of bromide–water [Br5–(H2O)6]5− and iodide–water [I2–(H2O)4]2− clusters in cationic tripodal receptor
Source: Royal Society of Chemistry journal article supplement (doi:10.1039/c4ce00149d), 2014-01-01
Supplement: c4ce00149d1.pdf [file c4ce00149d1.pdf]

**Electronic Supplementary Information**

**Hydrated anion glued capsular and non-capsular assembly of a tripodal host: solid state recognition of bromide-water  $[\text{Br}_5\text{-(H}_2\text{O)}_6]^{5-}$  and iodide-water  $[\text{I}_2\text{-(H}_2\text{O)}_4]^{2-}$  clusters in cationic tripodal receptor**

Md. Najbul Hoque<sup>a</sup> and Gopal Das\*<sup>a</sup>

*Department of Chemistry, Indian Institute of Technology Guwahati, Assam, 781 039, India.,*

*Fax: +91-361-258-2349; Tel: +91-361-258-2313*

*E-mail: [gdas@iitg.ernet.in](mailto:gdas@iitg.ernet.in)*

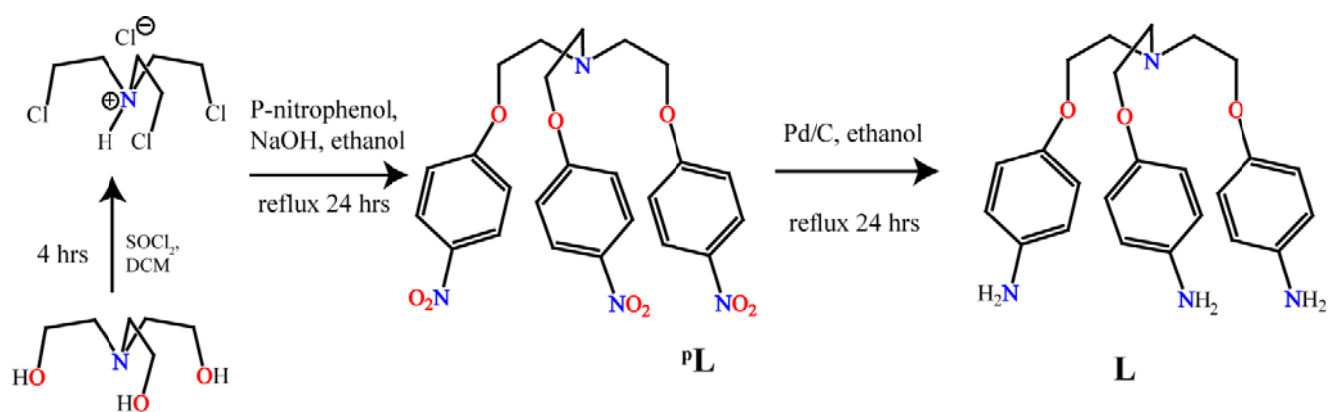

**Scheme 1.** Preparation of Tris[2-(4-nitrophenoxy)ethyl]amine (**pL**) and Tris[2-(4-aminophenoxy)ethyl]amine (**L**)

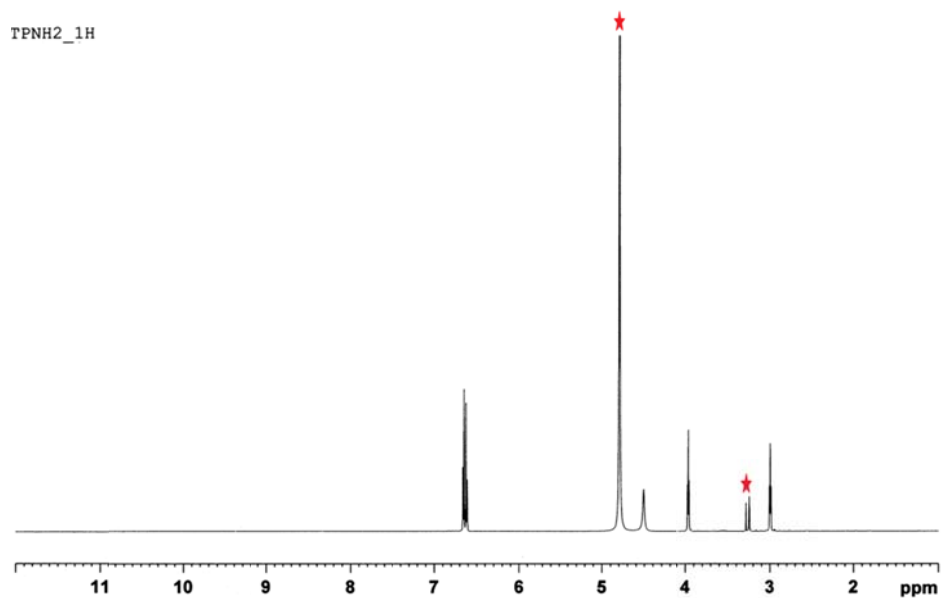

**Fig. S1**  $^1\text{H-NMR}$  spectrum of receptor **L** in  $\text{CD}_3\text{OD}$  at 298 K. Indicated peaks represent the solvent.

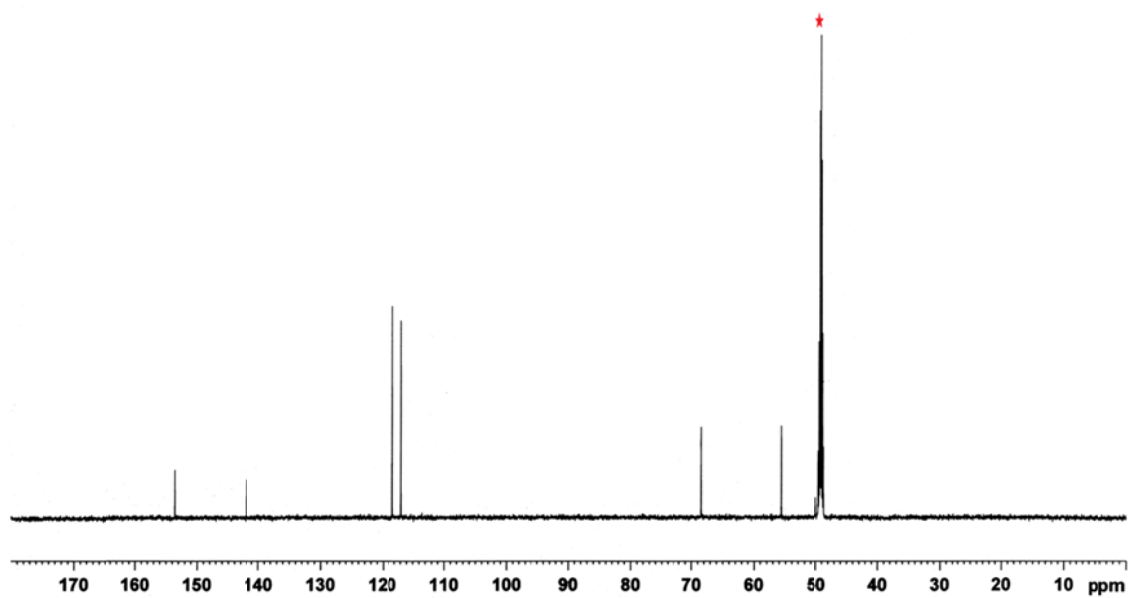

**Fig. S2**  $^{13}\text{C}$ -NMR spectrum of receptor **L** in  $\text{CD}_3\text{OD}$  at 298 K. Indicated peak represent the solvent.

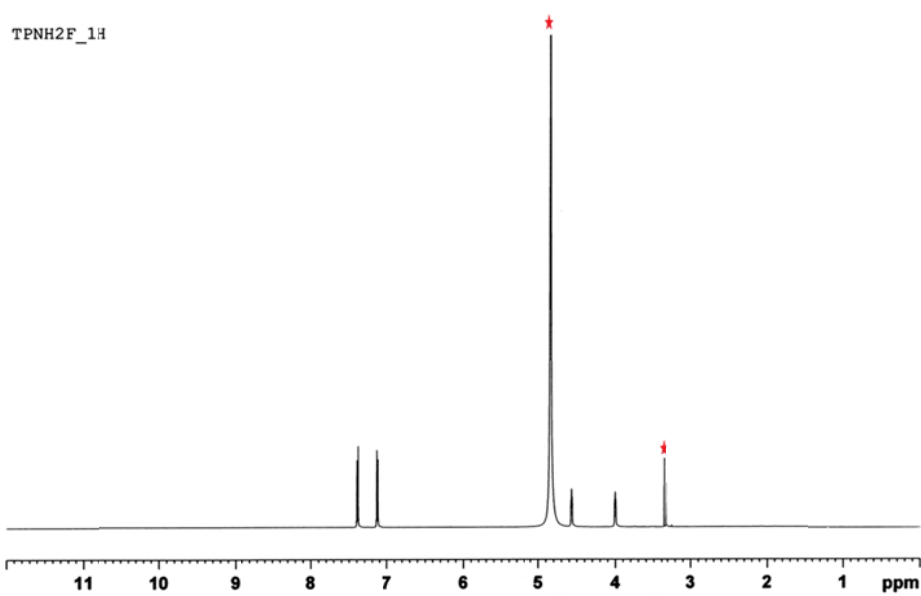

**Fig. S3**  $^1\text{H}$ -NMR spectrum of complex  $[\text{LH}_4\cdot 4\text{F}\cdot 5\text{H}_2\text{O}](1)$  in  $\text{CD}_3\text{OD}:\text{D}_2\text{O}$  (1:2) at 298 K. Indicated peaks represent the solvent.

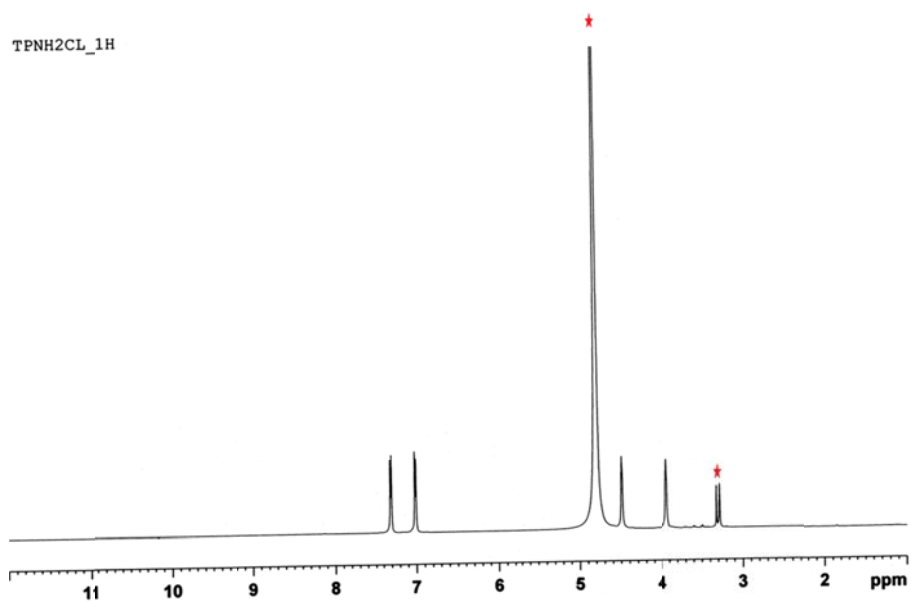

**Fig. S4** <sup>1</sup>H-NMR spectrum of complex  $[2LH_4 \cdot 8Cl \cdot 5H_2O](2)$  in  $CD_3OD:D_2O$  (1:2) at 298 K.

Indicated peaks represent the solvent.

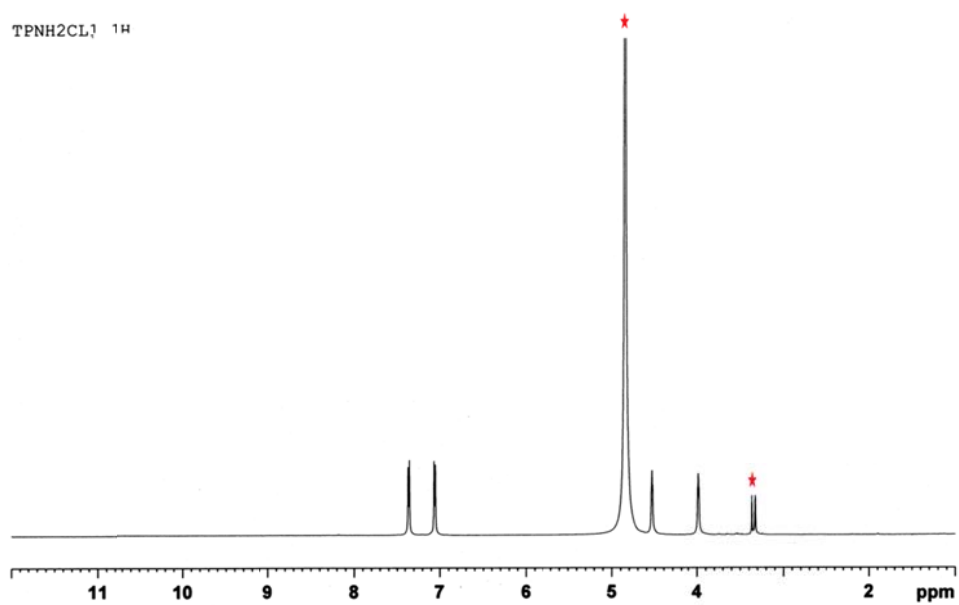

**Fig. S5** <sup>1</sup>H-NMR spectrum of complex  $[LH_4 \cdot 4Cl](3)$  in  $CD_3OD:D_2O$  (1:2) at 298 K. Indicated peaks represent the solvent.

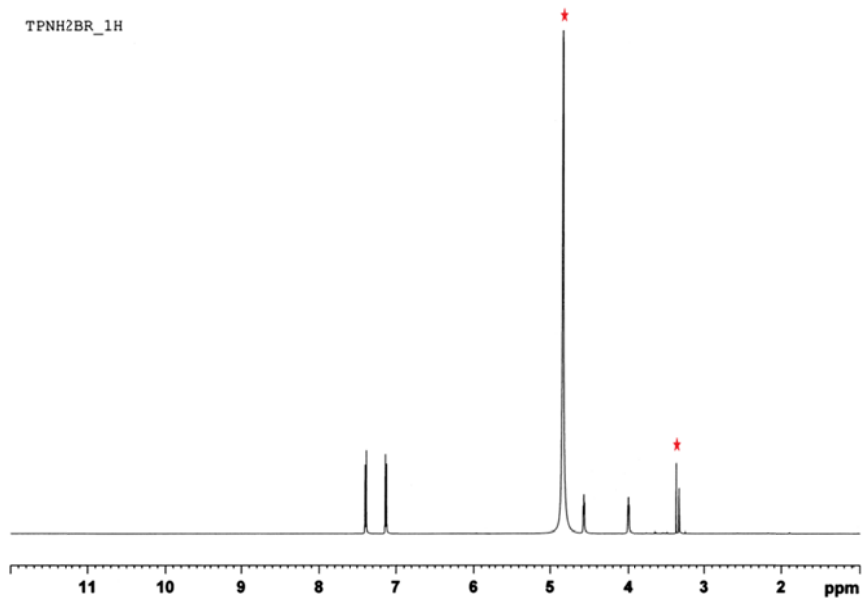

**Fig. S6**  $^1\text{H}$ -NMR spectrum of complex  $[\text{LH}_4 \cdot 4\text{Br} \cdot 5\text{H}_2\text{O}](4)$  in  $\text{CD}_3\text{OD}:\text{D}_2\text{O}$  (1:2) at 298 K.

Indicated peaks represent the solvent.

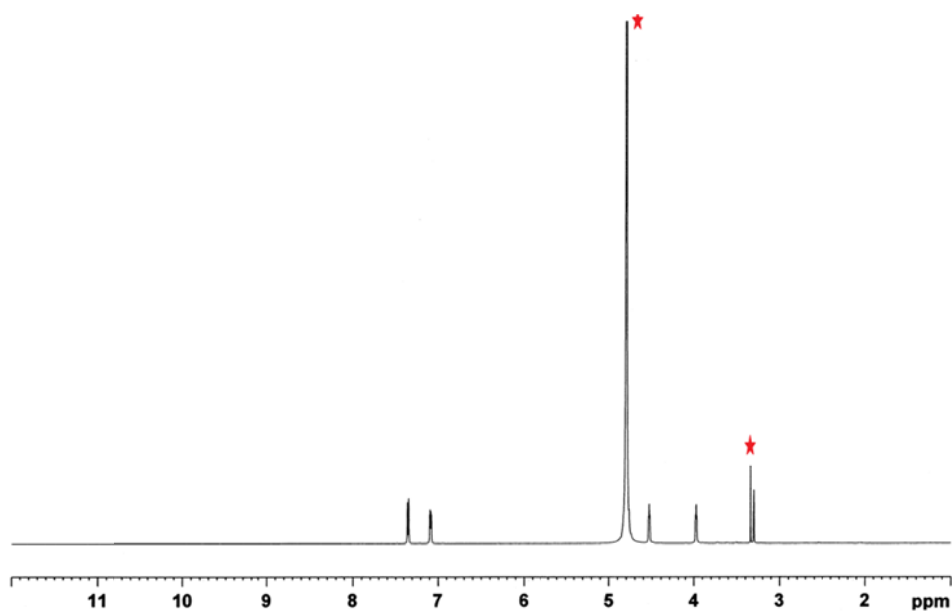

**Fig. S7**  $^1\text{H}$ -NMR spectrum of complex  $[4\text{LH}_4 \cdot 16\text{I}7 \cdot \text{H}_2\text{O}](5)$  in  $\text{CD}_3\text{OD}:\text{D}_2\text{O}$  (1:2) at 298 K.

Indicated peaks represent the solvent.

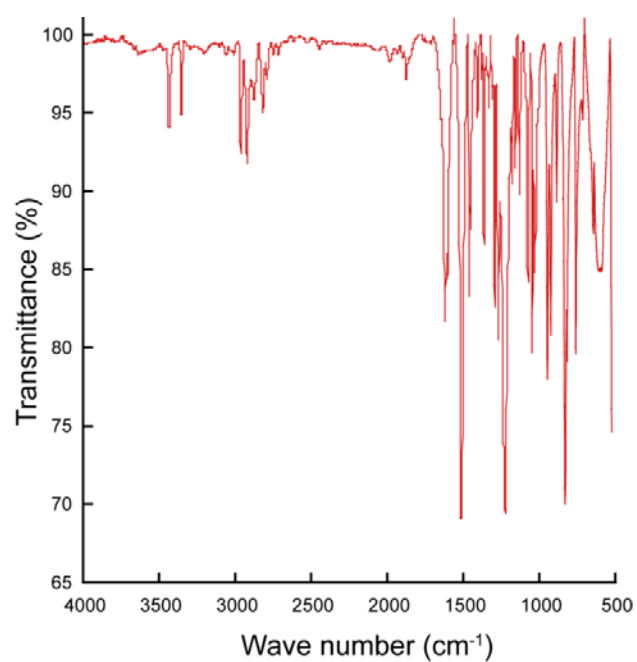

**Fig. S8** FT-IR spectrum of free receptor **L**.

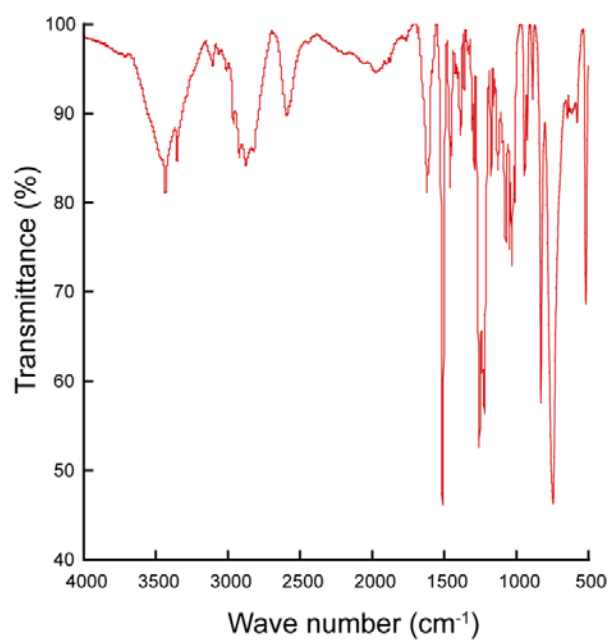

**Fig. S9** FT-IR spectrum of complex  $[LH_4 \cdot 4F \cdot 5H_2O](1)$ .

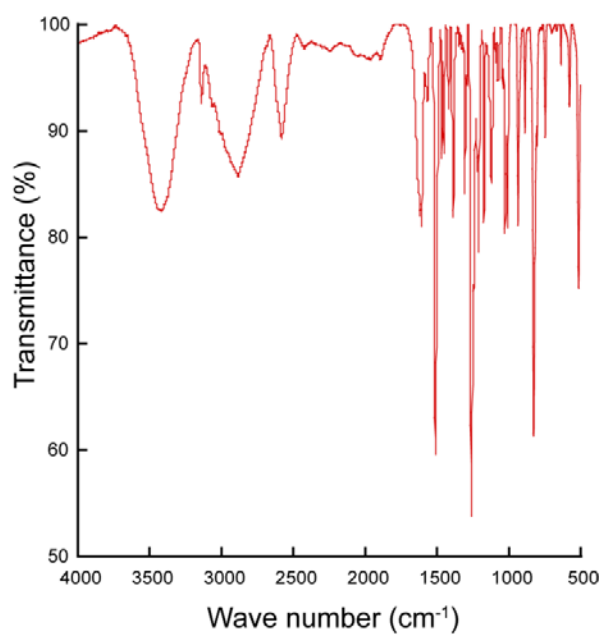

**Fig. S10** FT-IR spectrum of complex  $[2\text{LH}_4 \cdot 8\text{Cl} \cdot 5\text{H}_2\text{O}](2)$ .

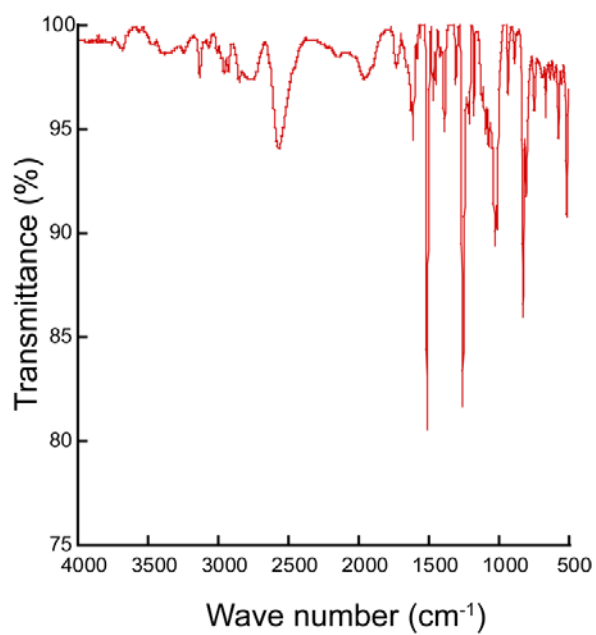

**Fig. S11** FT-IR spectrum of complex  $[\text{LH}_4 \cdot 4\text{Cl}](3)$ .

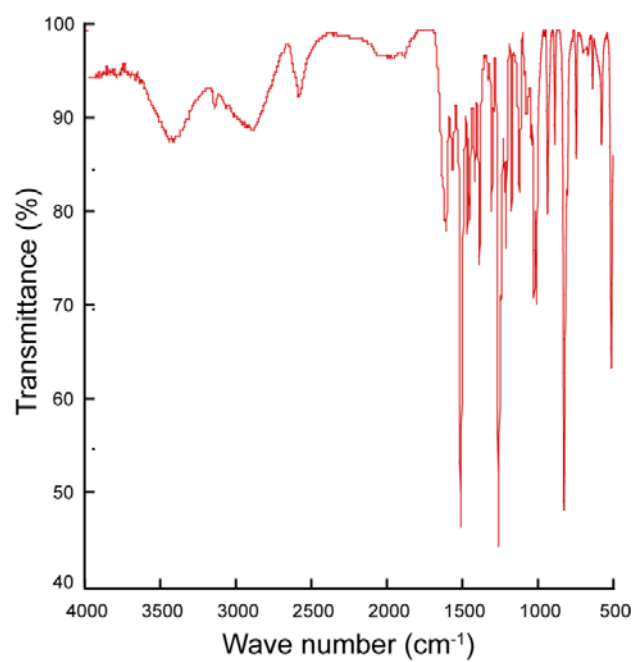

**Fig. S12** FT-IR spectrum of complex  $[\text{LH}_4 \cdot 4\text{Br} \cdot 5\text{H}_2\text{O}](4)$ .

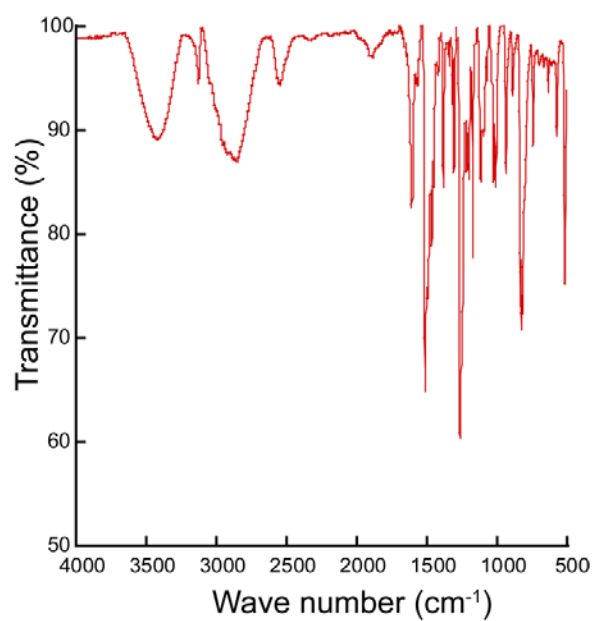

**Fig. S13** FT-IR spectrum of complex  $[4\text{LH}_4 \cdot 16\text{I7} \cdot \text{H}_2\text{O}](5)$ .



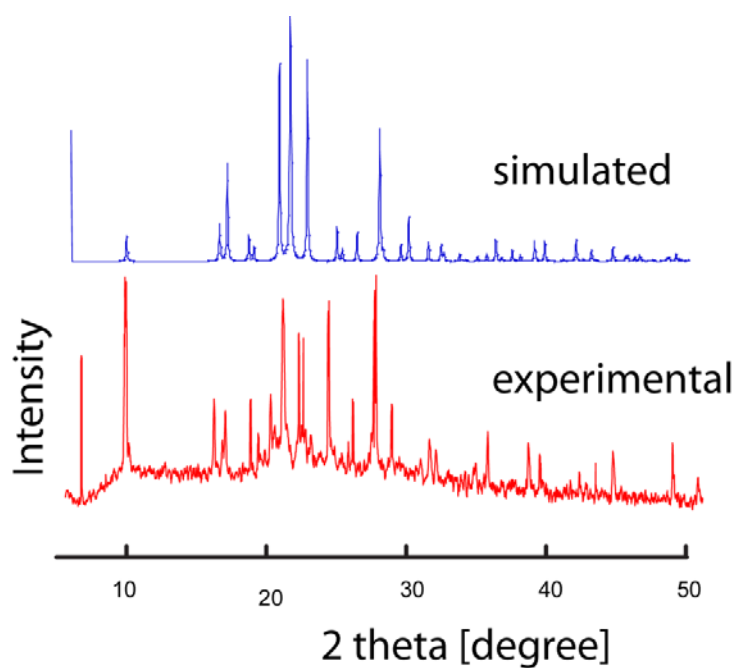

**Fig. S14** Powder X-ray diffraction: simulated pattern from the single crystal X-ray of free receptor **L** (blue), experimental pattern from the crystalline solid of free receptor **L** (red).

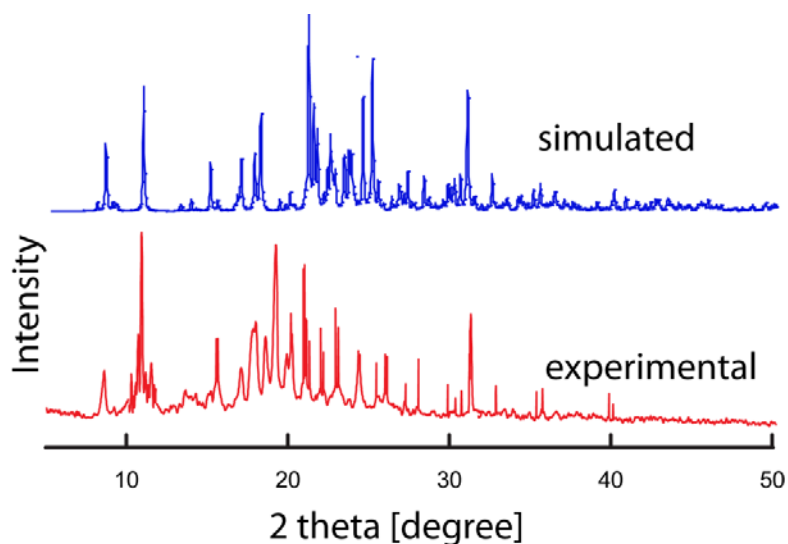

**Fig. S15** Powder X-ray diffraction: simulated pattern from the single crystal X-ray of complex  $[\text{LH}_4 \cdot 4\text{F} \cdot 5\text{H}_2\text{O}](\mathbf{1})$  (blue), experimental pattern from the crystalline solid of complex  $[\text{LH}_4 \cdot 4\text{F} \cdot 5\text{H}_2\text{O}](\mathbf{1})$  (red).

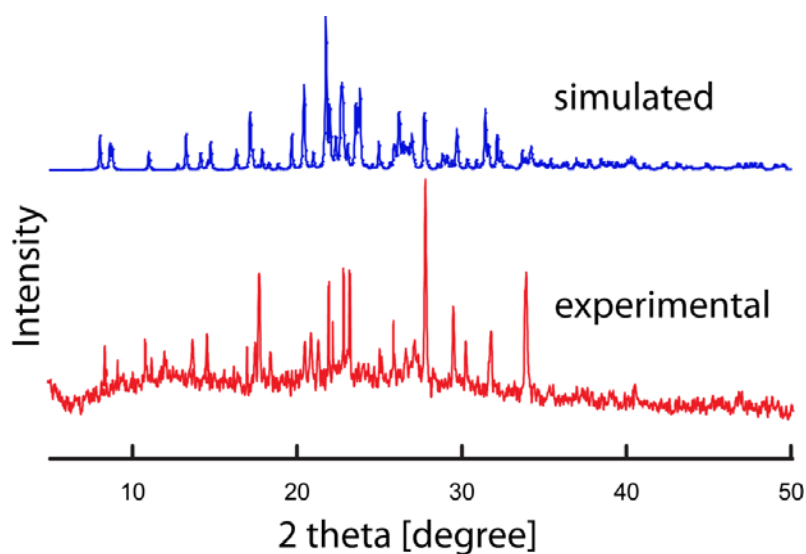

**Fig. S16** Powder X-ray diffraction: simulated pattern from the single crystal X-ray of complex  $[2\text{LH}_4\cdot 8\text{Cl}\cdot 5\text{H}_2\text{O}](2)$  (blue), experimental pattern from the crystalline solid of complex  $[2\text{LH}_4\cdot 8\text{Cl}\cdot 5\text{H}_2\text{O}](2)$  (red).

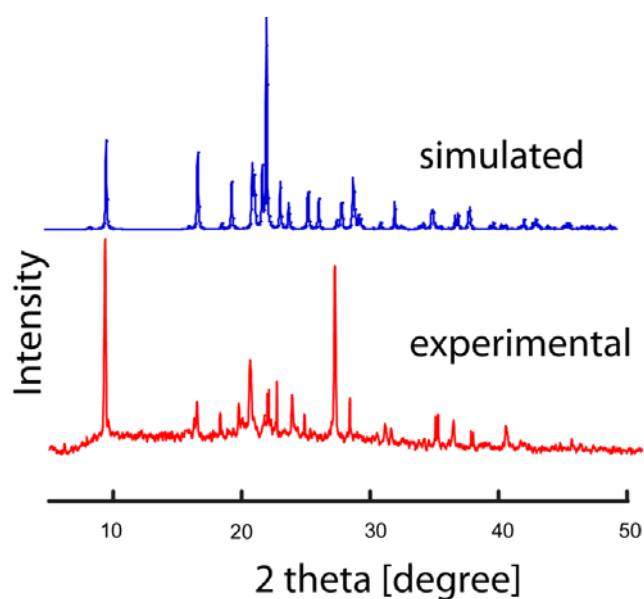

**Fig. S17** Powder X-ray diffraction: simulated pattern from the single crystal X-ray of complex  $[\text{LH}_4\cdot 4\text{Cl}](3)$  (blue), experimental pattern from the crystalline solid of complex  $[\text{LH}_4\cdot 4\text{Cl}](3)$  (red).

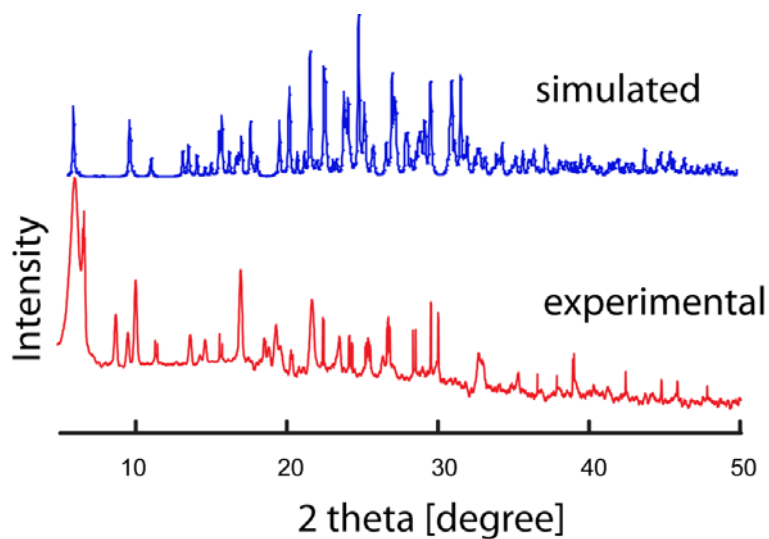

**Fig. S18** Powder X-ray diffraction: simulated pattern from the single crystal X-ray of complex  $[\text{LH}_4 \cdot 4\text{Br} \cdot 5\text{H}_2\text{O}](4)$  (blue), experimental pattern from the crystalline solid of complex  $[\text{LH}_4 \cdot 4\text{Br} \cdot 5\text{H}_2\text{O}](4)$  (red).

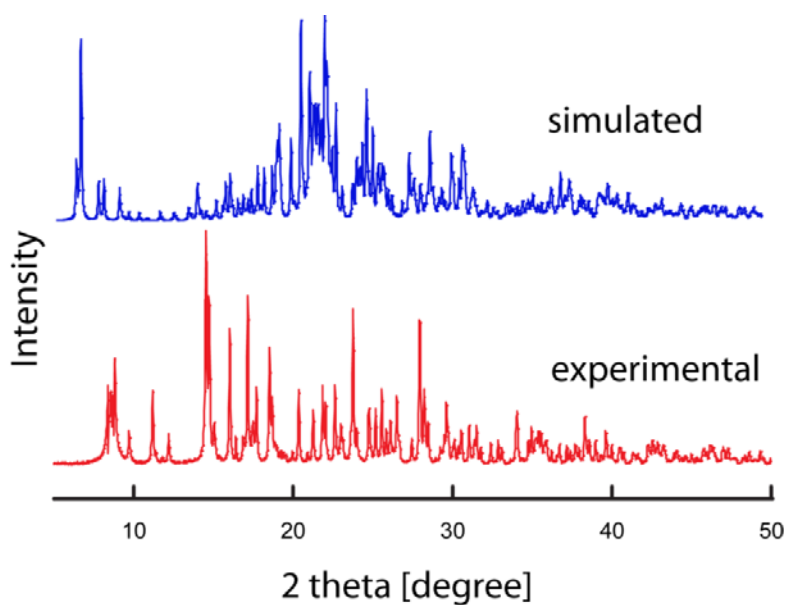

**Fig. S19** Powder X-ray diffraction: simulated pattern from the single crystal X-ray of complex  $[4\text{LH}_4 \cdot 16\text{I} \cdot 7\text{H}_2\text{O}](5)$  (blue), experimental pattern from the crystalline solid of complex  $[4\text{LH}_4 \cdot 16\text{I} \cdot 7\text{H}_2\text{O}](5)$  (red).

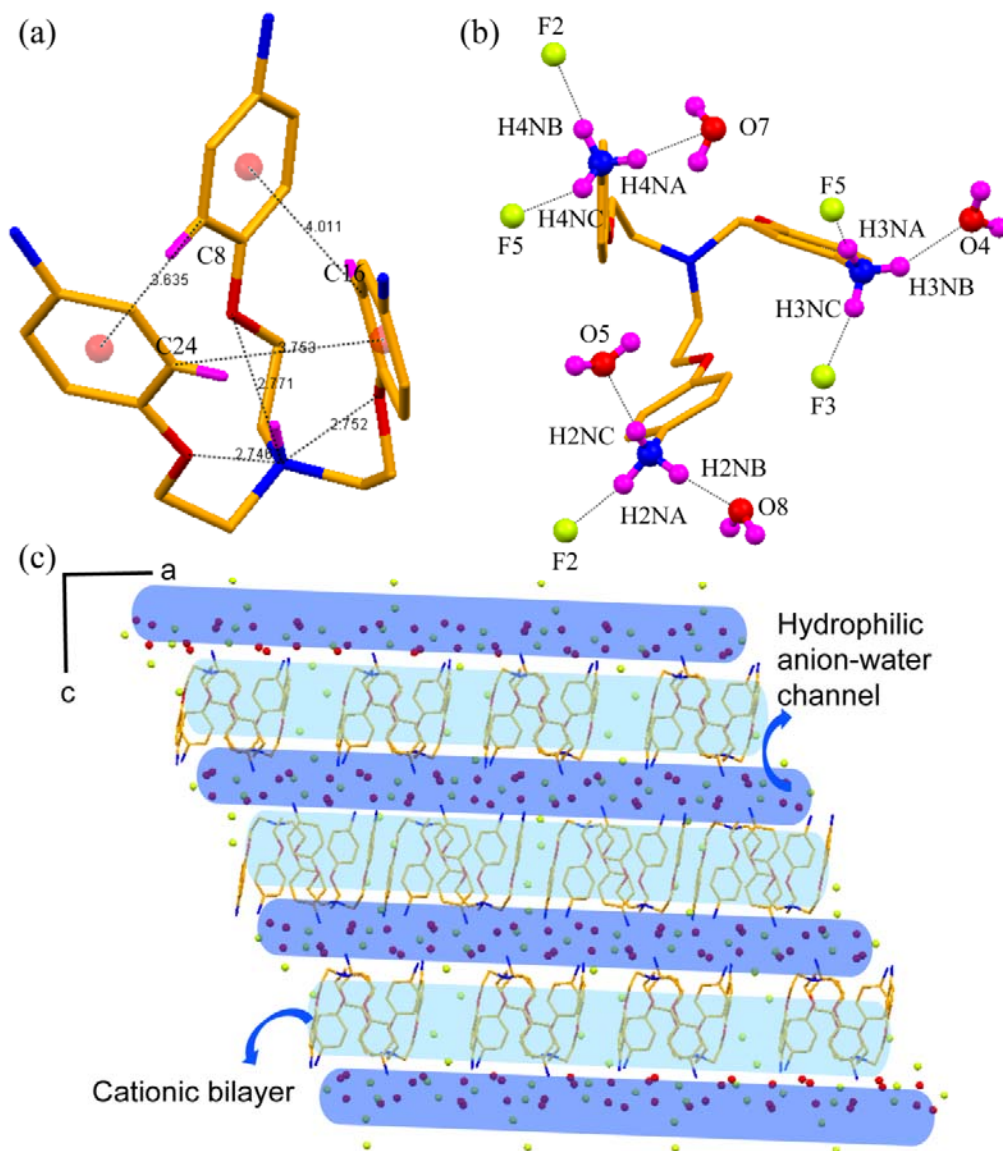

**Fig. S20** (a) Showing N—H...O and C—H... $\pi$  interactions that stabilized the bowl shaped conformation of the tripod receptor in complex **1**. (b) Depicting H-bonding interactions of  $[\text{NH}_3^+]$  groups with fluoride ions and water molecules. (c) Crystal packing as viewed down along *b*-axis showing the cationic bilayer assembly formation of ligand moieties diagonally with the fluoride-water entrapped between the adjacent ligand arrays forming hydrophilic anion-water channel.

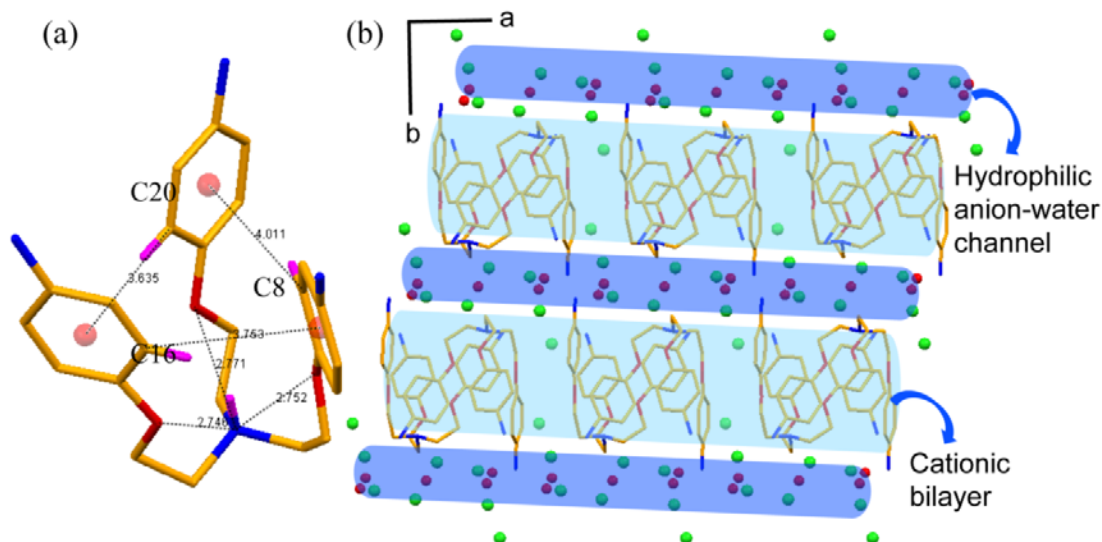

**Fig. S21** (a) Showing N—H···O and C—H··· $\pi$  interactions that stabilized the bowl shaped conformation of the tripodal receptor in complex **2**. (b) Crystal packing as viewed down along *b*-axis showing the cationic bilayer assembly formation of ligand moieties diagonally with the chloride-water entrapped between the adjacent ligand arrays forming hydrophilic anion-water channel in complex **2**.

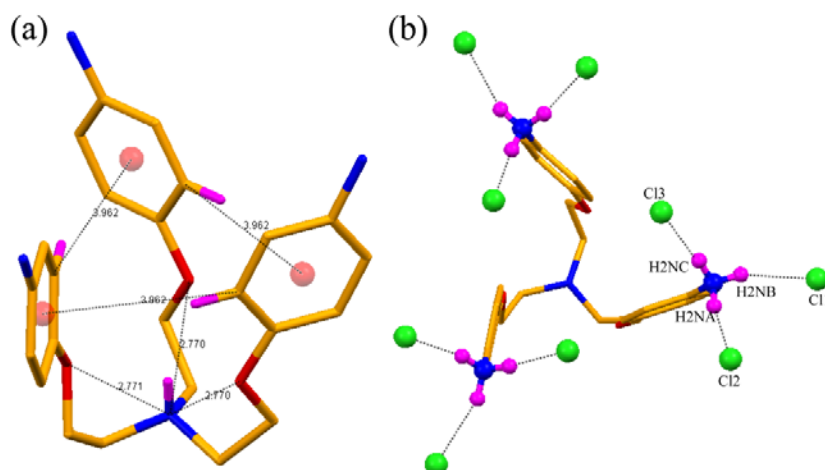

**Fig. S22** (a) Showing N—H···O and C—H··· $\pi$  interactions that stabilized the bowl shaped conformation of the tripodal receptor in complex **3**. (b) Depicting H-bonding interactions of  $[\text{NH}_3^+]$  groups with chloride ions.

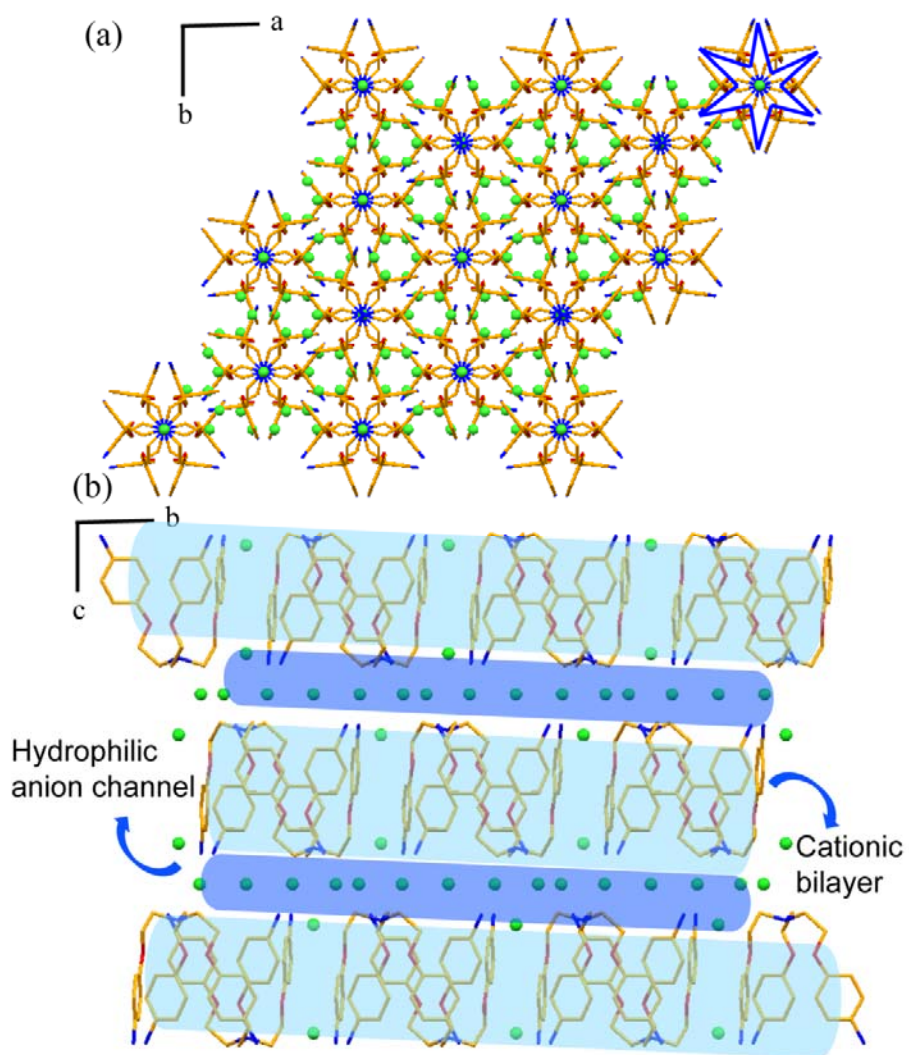

**Fig. S23** (a) Crystal packing along *c*-axis shows star like arrangement of tripodal receptor in capsular complex **3**. (b) Crystal packing viewed along *a*-axis shows chloride ion channel between cationic bilayer of tripodal receptor.

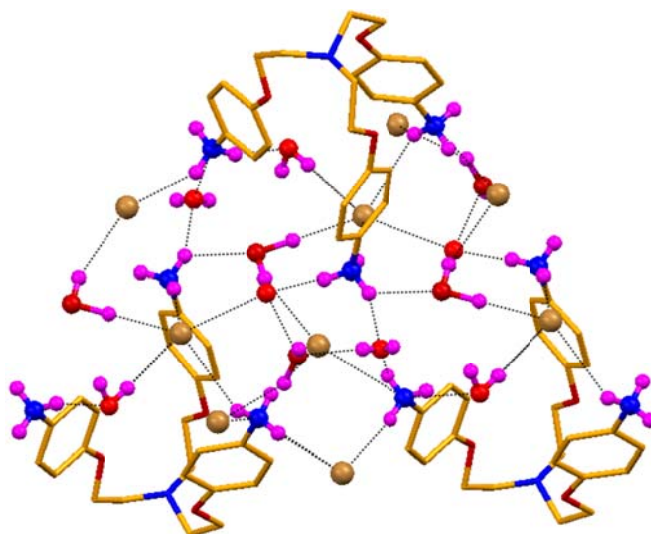

**Fig. S24** Non-capsular assembly of complex **4** mediated by several bromide-water cluster H-bonding interactions.

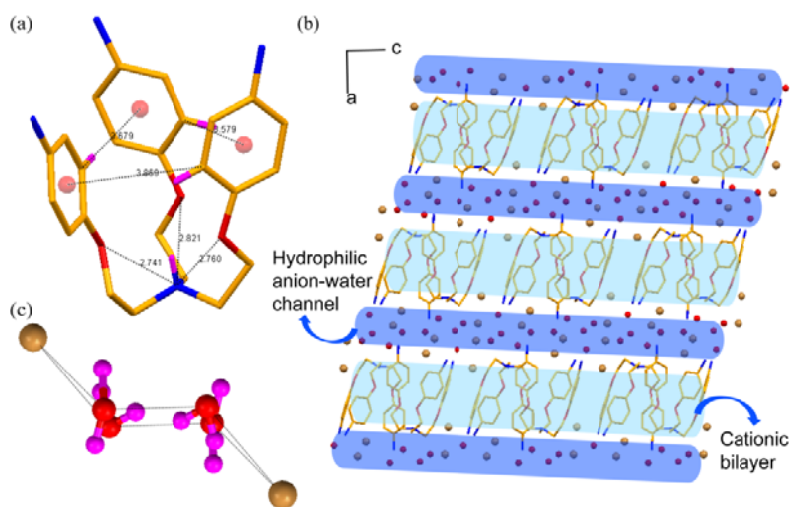

**Fig. S25** (a) Showing N—H $\cdots$ O and C—H $\cdots$  $\pi$  interactions that stabilized the bowl shaped conformation of the tripodal receptor in complex **4**. (b) Crystal packing as viewed down along *b*-axis showing the cationic bilayer assembly formation of ligand moieties diagonally with hydrophilic bromide-water channel entrapped between the adjacent ligand arrays in complex **4**. (c) Chair conformation of hexameric bromide-water cluster.

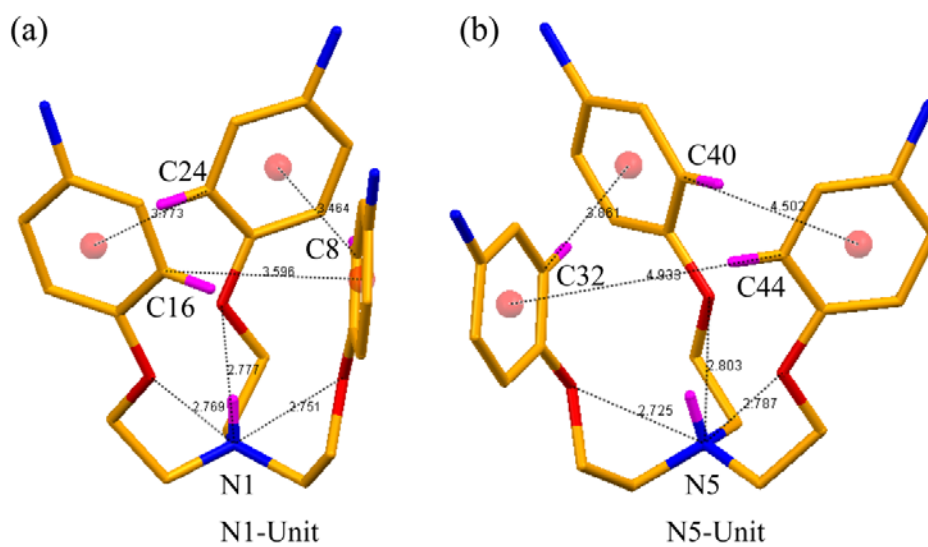

**Fig. S26** (a) and (b) Showing N—H···O and C—H··· $\pi$  interactions that stabilized the bowl shaped conformation in N1 and N5 unit in complex **5**.



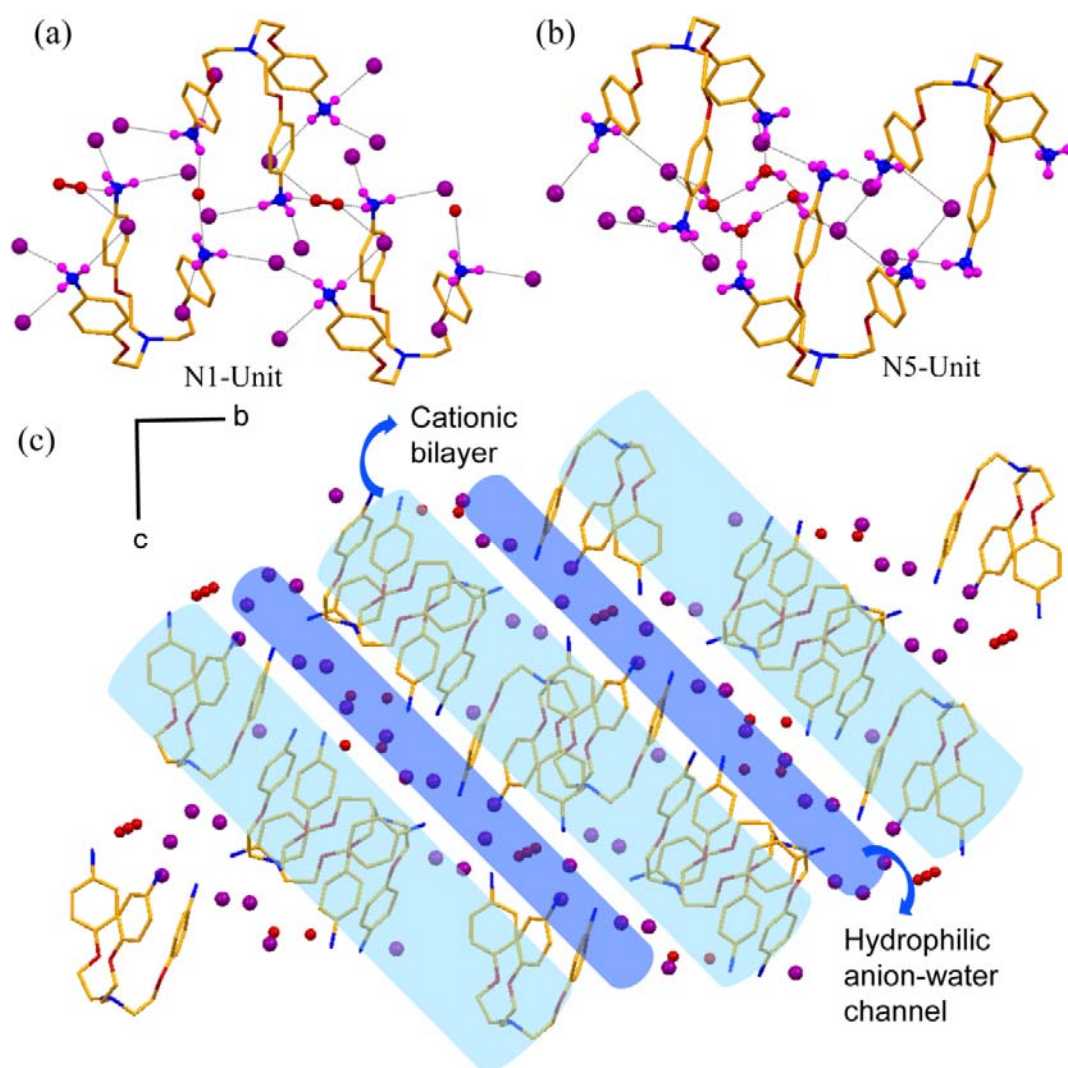

**Fig. S27** (a) and (b) Non-capsular assembly of two symmetry independent N1 and N5 unit mediated by several iodide-water H-bonding interactions in complex **5**. (c) Crystal packing as viewed down along *a*-axis showing the cationic bilayer assembly formation of ligand moieties diagonally with hydrophilic iodide-water channel entrapped between the adjacent ligand arrays in complex **5**.

**Table S1** Relevant H-bonding parameters details for compounds **1-6**.

| D—H···A<br>[L]                                              | d(D···A) Å | d(H···A) Å | < (D—H—A)° |
|-------------------------------------------------------------|------------|------------|------------|
| C5—H···O1                                                   | 3.536(1)   | 2.683(1)   | 152.7(9)   |
| C8—H···N2                                                   | 3.593(3)   | 2.733(2)   | 154.2(1)   |
| N2—H···C2                                                   | 3.611(3)   | 3.0451(1)  | 125.4(2)   |
| <b>[LH<sub>4</sub>·4F·5H<sub>2</sub>O](1)</b>               |            |            |            |
| N2—H2NA···F2                                                | 2.679(5)   | 1.720(3)   | 170.0(2)   |
| N2—H2NB···O8w                                               | 2.606(6)   | 1.740(6)   | 162.0(5)   |
| N2—H2NC···O5w                                               | 2.739(6)   | 1.960(6)   | 165.0(6)   |
| N3—H3NA···F5                                                | 2.604(3)   | 1.727(2)   | 168.1(2)   |
| N3—H3NB···O4w                                               | 2.828(4)   | 2.00(5)    | 153.4(2)   |
| N3—H3NC···F3                                                | 2.691(3)   | 1.811(2)   | 168.6(2)   |
| N4—H4NA···O7w                                               | 2.767(5)   | 1.922(3)   | 157.6(3)   |
| N4—H4NB···F2                                                | 2.766(5)   | 1.892(2)   | 167.1(3)   |
| N4—H4NC···F5                                                | 2.683(4)   | 1.888(2)   | 147.7(3)   |
| O4w—H4A···F3                                                | 2.767(4)   | 1.933(3)   | 166.6(20)  |
| O4w—H4B···F2                                                | 2.739(3)   | 1.941(2)   | 156.1(2)   |
| O5w—H5B···F1                                                | 2.819(7)   | 2.100(1)   | 143.0(12)  |
| O5w—H5A···F3                                                | 2.280(5)   | 1.465(2)   | 159.6(4)   |
| O6w—H6A···F5                                                | 2.370(4)   | 1.540(3)   | 164.0(4)   |
| O8w—H8A···F2                                                | 3.172(5)   | 2.487(3)   | 138.4(2)   |
| C5—H5···F4                                                  | 3.454(6)   | 2.528(4)   | 173.8(2)   |
| C13—H13···F4                                                | 3.145(5)   | 2.320(4)   | 147.6(2)   |
| C20—H20···F4                                                | 3.273(5)   | 2.459(4)   | 146.3(2)   |
| C1—H1A···O4W                                                | 3.400(4)   | 2.618(2)   | 137.9(2)   |
| C17—H17B···O6W                                              | 3.368(4)   | 2.493(3)   | 149.7(2)   |
| <b>[2LH<sub>4</sub>·8Cl<sub>4</sub>·5H<sub>2</sub>O](2)</b> |            |            |            |
| N2—H2NA···Cl1                                               | 3.286(4)   | 2.305(7)   | 165.0(2)   |
| N2—H2NB···Cl3                                               | 3.174(3)   | 2.392(1)   | 151.7(2)   |
| N2—H2NC···Cl2                                               | 3.072(4)   | 2.187(1)   | 172.4(2)   |
| N3—H3NA···Cl4                                               | 3.160(3)   | 2.450(4)   | 152.0(4)   |
| N3—H3NB···Cl3                                               | 3.225(3)   | 2.430(4)   | 148.0(5)   |
| N3—H3NA···Cl1                                               | 3.221(4)   | 2.600(3)   | 165.0(4)   |
| N4—H4NA···O5w                                               | 2.743(6)   | 1.863(5)   | 149.0(4)   |
| N3—H3NA···Cl1                                               | 3.244(5)   | 2.536(3)   | 169.7(2)   |
| N4—H4NB···Cl4                                               | 3.087(2)   | 2.220(6)   | 164.5(2)   |
| N4—H4NC···Cl3                                               | 3.218(3)   | 2.399(1)   | 153.0(2)   |
| C4—H4···Cl1                                                 | 3.574(3)   | 2.893(7)   | 131.2(2)   |
| C12—H12···Cl1                                               | 3.523(4)   | 2.819(1)   | 133.4(2)   |
| C23—H23···Cl1                                               | 3.732(3)   | 2.940(1)   | 144.0(2)   |
| O5w—H5A···Cl1                                               | 3.184(3)   | 2.380(5)   | 172.0(6)   |
| C1—H1B···Cl2                                                | 3.515(3)   | 2.747(9)   | 136.4(2)   |

|                                                  |          |          |           |
|--------------------------------------------------|----------|----------|-----------|
| C10—H10B···Cl2                                   | 3.751(3) | 2.887(1) | 149.0(2)  |
| O4w—H4A···Cl2                                    | 3.187(3) | 2.354(1) | 144.6(2)  |
| C17—H17···Cl3                                    | 3.554(4) | 2.814(1) | 133.6(2)  |
| O4w—H4B···Cl3                                    | 3.203(4) | 2.403(1) | 157.0(2)  |
| C2—H2A···Cl4                                     | 3.673(3) | 2.867(7) | 141.0(2)  |
| C9—H9A···Cl4                                     | 3.618(3) | 2.648(7) | 139.2(2)  |
| O5w—H5B···Cl4                                    | 3.141(5) | 2.300(1) | 147.0(7)  |
| <b>[LH<sub>4</sub>·4Cl](3)</b>                   |          |          |           |
| N2—H2NB···Cl1                                    | 3.041(3) | 2.165(6) | 163.8(2)  |
| N2—H2NA···Cl2                                    | 3.184(2) | 2.334(2) | 120.6(2)  |
| N2—H2NC···Cl1                                    | 3.038(3) | 2.152(1) | 135.0(3)  |
| C1—H1A···Cl1                                     | 3.543(3) | 2.855(6) | 128.5(2)  |
| C1—H1B···Cl1                                     | 3.724(2) | 2.899(3) | 143.4(2)  |
| <b>[LH<sub>4</sub>·4Br·5H<sub>2</sub>O](4)</b>   |          |          |           |
| N2—H2NA···Br1                                    | 3.225(5) | 2.359(7) | 164.3(3)  |
| N2—H2NB···Br3                                    | 3.603(4) | 3.043(6) | 122.7(3)  |
| N2—H2NC···Br4                                    | 3.321(5) | 2.453(6) | 165.4(3)  |
| N3—H3NA···Br3                                    | 3.415(5) | 2.545(8) | 165.5(30) |
| N3—H3NB···O6w                                    | 2.782(7) | 1.911(5) | 165.6(4)  |
| N3—H3NC···O5w                                    | 2.809(6) | 1.996(5) | 151.4(4)  |
| N4—H4NA···O4w                                    | 2.771(8) | 1.911(6) | 161.9(4)  |
| N4—H4NB···Br4                                    | 3.388(5) | 2.501(7) | 173.1(3)  |
| N4—H4NC···Br1                                    | 3.344(5) | 2.554(6) | 148.2(3)  |
| C9—H9B···Br1                                     | 3.621(6) | 2.821(7) | 140.3(3)  |
| O8w—H8OB···Br1                                   | 3.475(7) | 2.660(9) | 146.0(7)  |
| C1—H1B···Br2                                     | 3.832(5) | 2.901(6) | 161.1(3)  |
| O4w—H4OA···Br2                                   | 3.263(7) | 2.650(8) | 125.0(6)  |
| O5w—H5OB···Br2                                   | 3.358(6) | 2.600(1) | 142.0(9)  |
| O7w—H7OA···Br2                                   | 3.264(7) | 2.400(1) | 126.0(8)  |
| O4w—H4OB···Br3                                   | 3.319(6) | 2.500(7) | 176.0(8)  |
| O8w—H4OA···Br3                                   | 3.528(7) | 2.300(2) | 175.0(11) |
| C4—H4···Br4                                      | 3.717(5) | 2.889(6) | 149.0(3)  |
| O7w—H7OB···Br4                                   | 3.258(8) | 2.360(4) | 157.0(3)  |
| <b>[4LH<sub>4</sub>·16I·7H<sub>2</sub>O] (5)</b> |          |          |           |
| N2—H2NA···I5                                     | 3.461(9) | 2.629(6) | 156.3(6)  |
| N2—H2NB···I6                                     | 3.551(9) | 2.687(6) | 158.3(8)  |
| N2—H2NC···O9w                                    | 2.920(3) | 2.070(2) | 164.2(6)  |
| N3—H3NA···I2                                     | 3.565(9) | 2.693(7) | 166.8(6)  |
| N3—H3NB···O8w                                    | 2.941(8) | 2.119(1) | 153.2(6)  |
| N3—H3NC···O5w                                    | 3.546(8) | 2.717(8) | 155.3(6)  |
| N4—H4NA···I2                                     | 3.547(8) | 2.686(7) | 163.1(5)  |
| N4—H4NB···I1                                     | 3.696(7) | 2.878(8) | 153.4(5)  |
| N4—H4NC···I3                                     | 3.480(8) | 2.639(8) | 157.8(5)  |
| N6—H6NA···I7                                     | 3.550(1) | 2.671(1) | 171.2(9)  |

|                         |          |          |           |
|-------------------------|----------|----------|-----------|
| N6—H6NB…I8              | 3.530(1) | 2.778(9) | 143.2(9)  |
| N6—H6NC…O7 <sub>w</sub> | 2.780(3) | 1.910(3) | 163.0(1)  |
| N7—H7NA…I7              | 3.650(1) | 2.967(1) | 134.5(9)  |
| N7—H7NB…I8              | 3.600(2) | 2.744(2) | 160.8(9)  |
| N8—H8NA…I3              | 3.492(9) | 2.870(8) | 128.3(6)  |
| N8—H8NA…I5              | 3.764(9) | 3.151(6) | 127.9(6)  |
| N8—H8NB…I6              | 3.518(8) | 2.658(6) | 162.7(6)  |
| N8—H8NC…I6              | 3.680(1) | 2.835(9) | 158.2(6)  |
| O8…I6                   | 3.711(7) | ---      | ---       |
| I1…O9                   | 3.320(2) | ---      | ---       |
| C39—H39…I3              | 3.820(1) | 3.113(8) | 134.2(8)  |
| C41—H41…I4              | 3.850(1) | 2.927(1) | 160.2(6)  |
| O10—I0C…I4              | 3.630(3) | 2.800(2) | 148.0(17) |
| C17—H17…I5              | 3.930(1) | 3.150(6) | 144.6(7)  |
| C34—H34…I5              | 3.850(1) | 3.019(6) | 139.0(6)  |
| C9—H9B…I6               | 3.863(9) | 3.119(7) | 134.7(6)  |
| C29—H29…I7              | 3.800(1) | 2.962(1) | 150.1(8)  |
| C25—H25…I8              | 3.890(1) | 3.060(9) | 145.0(7)  |
| O10…I8                  | 3.730(3) | ---      | ---       |
